---

**Abstract**

# PUB1/359: The Use of the Internet for CME Purposes in Turkey

H Yaman; A Kut

Ankara Numune Teaching Hospital, Ankara, Turkey

---

**Abstract**

---

While continuing medical education (CME) is receiving increasing attention from medical educators and health administrators world-wide, many efforts need to be made to improve its performance and overall effectiveness. CME has depended primarily on periodic courses and conferences. High costs and distant location make CME journals an alternative to these events. The Turkish Medical Association is publishing a journal for CME purposes called STED. By this way, every month, 9000 exemplars of each edition are distributed mainly to primary care physicians in the whole of Turkey. To make the journal also accessible to non-subscribers and professionals, who live outside Turkey, English abstracts of articles published in STED are going to be prepared and published soon by Internet services ([www.ato.org.tr](http://www.ato.org.tr)). By increasing the use of computer-assisted teaching and modern telecommunications, in the near future, the costs of CME can be reduced and its effectiveness improved.

(*J Med Internet Res* 1999;1(suppl1):e104) doi: [10.2196/jmir.1.suppl1.e104](https://doi.org/10.2196/jmir.1.suppl1.e104)

---

**KEYWORDS**Internet; CME; Primary Care; Electronic Publishing

---

###Reviewer names will be inserted here### published 19.09.99.

*Please cite as:*

Yaman H, Kut A

PUB1/359: The Use of the Internet for CME Purposes in Turkey

*J Med Internet Res* 1999;1(suppl1):e104

URL: <http://www.jmir.org/1999/suppl1/e104/>

doi: [10.2196/jmir.1.suppl1.e104](https://doi.org/10.2196/jmir.1.suppl1.e104)

PMID:

Except where otherwise noted, articles published in the Journal of Medical Internet Research are distributed under the terms of the Creative Commons Attribution License (<http://www.creativecommons.org/licenses/by/2.0/>), which permits unrestricted use, distribution, and reproduction in any medium, provided the original work is properly cited.
